# Supplementary material for: Joint analysis of coastal altimetry and HF radar data: observability of seasonal and mesoscale ocean dynamics in the Bay of Biscay
Source: Copernicus journal article supplement (doi:10.5194/os-2018-33), 2018-03-26
Supplement: Supplementary file [file os-2018-33-AC2-supplement.zip]

**Anonymous Referee #2**

the paper focuses on the validation of two different altimetry products and aims at demonstrating the complementary with high-frequency radar observations of surface currents in the bay of Biscay. the manuscript has a few flaws, that should be accounted for properly before it is accepted for publication. details are given below for the Authors and the Editorial Board.

---

**Dear reviewer,**

**Thank you for your thorough reading of the text and the exhaustive review. Your fruitful comments have improved the article.**

**Best regards,  
Ivan Manso**

Comments are enumerated

AR = author's response

AC = author's changes in manuscript

Abstract:

1. define "surface currents"

AR: Done.

AC: Page 1, line 8.

2. correct the spatial and temporal resolution: depending on the HFR system, they can be as low as 300m to 12km, 5 min to 3 hours; same corrections apply within the text.

AR: Done.

AC: Page 1, line 9.

3. line 20: what variability is the Author referring to? why is it so? it would be useful to have these details in the abstract

AR: The line has been rephrased (see comment 6) and this variability it is not mentioned any more.

4. line 25: is this correlation increase statistically significant? is there a real benefit in including a simplified Ekman current model to the data, given the amount of processing the dataset already go through?

AR: Thank you for this comment, the significance of the correlation is 90%, but we forgot to mention it in the text, therefore, it has been added at page 8, line 16. With regard to the addition of the Ekman current model, it is true that the qualitative benefit is not high, but apart from providing a moderate benefit it is methodologically interesting and gives way to a better analysis.

5. check grammar and break sentences to improve readability (mainly within the manuscript)

AR: done.

6. lines 20-25: I personally would rephrase this sentence in order to focus on benefits first and limitations after; for instance, something like: "Both HFR and altimetry capture the main oceanographic features in the region (the IPC and the mesoscale eddies), however performances reduce in the areas closer to shore because of ....", or similar.

AR: Rephrased.

AC: Page 1, lines 20-24.

#### Introduction:

7. page2, line4: references to Jerico and Jerico-Next should be added

AR: Done.

AC: Page2, line 2.

8. page2, line6: cit: "...best possible quality indicators..." of what?

AR: This sentence has been rephrased.

AC: Page2, line 6.

9. page2, line19: definition of "HF" is missing; the guess is, it means High-Frequency spectral components, but it confuses with the acronym HFR

AR: Changed to high-frequency.

AC: Page 2, line 19.

10. page2, line20: HFR do not measure "inertial waves" but can resolve "inertial currents" if the proper grid resolution is set up

AR: Thank you, it was a mistake. It has been corrected.

AC: Page 2, line20.

11. page3, line 12: missing network after HFR

AR: Done.

AC: Page 3, line 12.

12. page3, line 15-18: one of the major motivations of this present work - that is, the comparison of the two products - is not stressed out properly in my opinion; this is actually te added value to this manuscript.

AR: Rephrased.

AC: Page 2, lines 18-20.

#### Section 2.1.1

13. radial velocities are not measured directly; they are derived from the inversion of the 1st order scatter from Bragg-matching waves

AR: We have changed 'measure' to 'infer'.

AC: Page 3, line 25.

14. operational range is usually frequency and bandwidth dependent; low-frequency systems have usually narrower bandwidths thus boosting range but with inversely-proportional range resolution - 40KHz bandwidth should provide a radial range resolution of  $\sim 3.7\text{km}$ , not 5km as stated.

AR: It is true; however, the range cell and angular resolutions are set to 5 km and  $5^\circ$  respectively.

AC: We have added this clarification in page 4, line 2.

15. "noise to signal ratio" should be the opposite: signal to noise ratio.

AR: Done.

AC: Page 4, line 3.

16. is it the RT HFR product being used, or the reprocessed DM data set used instead?

AR: The DM one.

17. "receipt antenna pattern" should be "receive antenna pattern"

AR: Done.

AC: Page 4, line 4.

18. bi-annual calibration: performed every two years, or twice per year?

AR: It has been performed at least every two years.

AC: We have clarified it at page 4, line 4.

19. Page 4, lines 5-13: this section is confusing. Gurgel (1994) and Lipa and Barrick (1983) proposed the unweighted least-square fit for the WERA and the Codar systems. The first does a 1-1 match of radials from two stations, the second uses a spatial search radius. The OMA analysis has nothing to do with this. OMA was developed by Kaplan and Lekien (2007). My understanding is the following: radials in polar coordinate systems from the two separate stations were mapped to currents on a cartesian grid using the HFR\_Progs Matlab package; then, an OMA analysis was performed for gap-filling purposes. Since the results of the conventional least-squares approach were similar to the OMA output, it was decided to use the OMA products for the following analysis. If that is the case, there is at least one motivation for me to ask 1, if there is any quantitative comparison between the OMA and the LS fit with any other data set (see for instance Cosoli et al., 2015, who tested the EOF interpolation versus the conventional LS fit in the Malta Channel); 2, to have at least a map of the comparison metrics between the OMA - LS fit products. The reason being: OMA is fitting a limited number of modes which will inevitably lose some observed structures, and most likely adds some spurious structure that needs to be accounted for properly.

AR: Thank you for the in-depth revision of this part. The whole paragraph has been checked and rewritten to allow more clear explanations. Indeed, this is not the first time we used both LS fit and OMA for total current retrieval. Quantitative comparison between both methods have been performed in Solabarrieta et al. 2016, from a Lagrangian perspective and in Hernandez-Carrasco (this same issue- see <https://www.ocean-sci-discuss.net/os-2018-26/>).

(Solabarrieta, L., Frolov, S., Cook, M., Paduan, J., Rubio, A., González, M., Mader, J., and Charria, G.: Skill Assessment of HF Radar-Derived Products for Lagrangian Simulations in the Bay of Biscay, *Journal of Atmospheric and Oceanic Technology*, 33, 2585–2597, <https://doi.org/10.1175/JTECH-D-16-0045.1>, 2016.)  
AC: page 4, lines 7-14.

### Section 2.1.2

20. page4, lines28-32: details should be provided about this data processing approach, especially in relation to the spatial filtering approach. References should be added to the Loess filter because it needs to be understood properly in order to avoid biases at ranges from the coastline within the filter spatial cut-off length. If the filtered products are used to derive the along-track geostrophic currents, I would expect a systematic bias between HFR and satellite in the coastal regions; this would explain for instance the biases documented in Figure 5 for the first 4-5 bins; also, it would most likely explain why correlation is maximised between km 40 and 50 (3rd panels, figure 5 a and b) - page5, lines1:5: same considerations as above apply to this dataset.

AR: We have bias if we have systematic errors in SLA at the coast which are not filtered by the data editing process and then extrapolated offshore by the filter. This is true for both CTOH and CMEMS products even if the filters and cut off frequency (and then area where errors are extrapolated) are not the same. And indeed, we know that the accuracy of altimetry data is lower in the 20-30 km coastal band, so it might be a source of differences between altimetry and HFR data. But the larger the oceanic signal (larger signal-over-noise ratio), the lower this effect will be observed anyway. Additionally, note that SLA errors approaching the coast are not usually systematic as they are mainly due to several sources (signal perturbations in altimeter/radiometer footprint, SSB, tidal & DAC corrections) which vary from one cycle to another.

AC: An explanation with regard to this has been added in page 5, lines 10-13. The reference to the Loess filter has been added in page 5 line 5 (Cleveland, W.S. and Devlin, S.J.: Locally Weighted Regression: An Approach to Regression Analysis by Local Fitting, *JASA*, 83, 596-610,1988).

### Section 2.2

21. page5, lines17-24: while the moving-average filter is probably fine in removing the low-frequency components from the HFR data set, it would be useful to have also some quantitative results of the sensitivity study about the 2, 5, 10, 15 d windows. How was the phase shift introduced by the MA process handled, for instance?

AR: These are the results of the sensitivity tests carried out for the pointwise comparison, in terms of correlation, where the 10-d window seems to be the most reasonable choice:

| <u>CTOH</u>                                                                            |                                                                                        | <u>CMEMS</u>                                                                           |                                                                                        |
|----------------------------------------------------------------------------------------|----------------------------------------------------------------------------------------|----------------------------------------------------------------------------------------|----------------------------------------------------------------------------------------|
| Point E:<br>2 days → r=0.37<br>5 days → r=0.42<br>10 days → r=0.48<br>15 days → r=0.50 | Point W:<br>2 days → r=0.59<br>5 days → r=0.60<br>10 days → r=0.64<br>15 days → r=0.59 | Point E:<br>2 days → r=0.45<br>5 days → r=0.51<br>10 days → r=0.53<br>15 days → r=0.54 | Point W:<br>2 days → r=0.53<br>5 days → r=0.60<br>10 days → r=0.60<br>15 days → r=0.54 |

With regard to the phase shift, there is not such an effect because the data used in the MA is always the original. That is, the filtered data is not used in the MA. Therefore, it is independent of doing it forward or backward.

22. Given the spatial smoothing the altimetry data goes through, I believe a similar thing should be done for the HFR data set, so that to avoid any processing bias.

AR: Although the radar data was already smoother than the altimetry one, we have applied two spatial filters to the radar data for the along-track comparison in order to see which the effects of this filtering are. In the cases where the Ekman currents are used, they are also spatially filtered. In the next table the correlations between altimetry and HFR are shown at the two points related to this comparison. The no cutoff results are the same results of the Table 1 (in the text), however more decimal numbers are used to show which are the effects of the filtering. The correlations scarcely change and in some cases are even lower than the original ones, therefore the spatial filtering does not improve the analysis. As it can be seen in the figures below, the results do not change neither along the track. The mean values and the std of the radar are a bit lower as we use bigger cutoffs, however, as it has been said the difference is almost imperceptible. Therefore, we are not going to make any change in the analysis in this sense.

| Cutoff                                | $r(AC_G)$                     |                               | $r(AC_G + AC_E)$              |                               |
|---------------------------------------|-------------------------------|-------------------------------|-------------------------------|-------------------------------|
|                                       | $E_T$                         | $Max_T$                       | $E_T$                         | $Max_T$                       |
| 65 km                                 | CTOH: 0.5210<br>CMEMS: 0.5476 | CTOH: 0.5317<br>CMEMS: 0.5783 | CTOH: 0.6249<br>CMEMS: 0.6339 | CTOH: 0.6447<br>CMEMS: 0.6694 |
| 40 km                                 | CTOH: 0.5294<br>CMEMS: 0.56   | CTOH: 0.5421<br>CMEMS: 0.5927 | CTOH: 0.6284<br>CMEMS: 0.6447 | CTOH: 0.6503<br>CMEMS: 0.6794 |
| No cutoff<br>(values of the<br>table) | CTOH: 0.5261<br>CMEMS: 0.5572 | CTOH: 0.5452<br>CMEMS: 0.5951 | CTOH: 0.6223<br>CMEMS: 0.6462 | CTOH: 0.6472<br>CMEMS: 0.6824 |

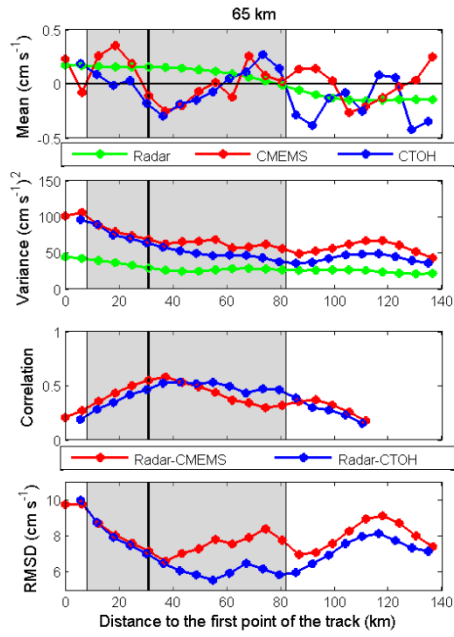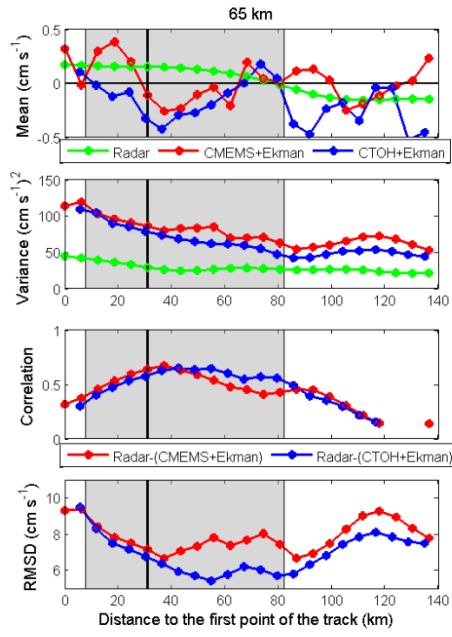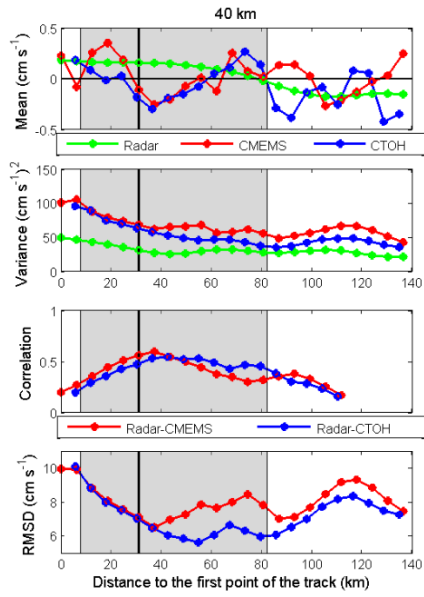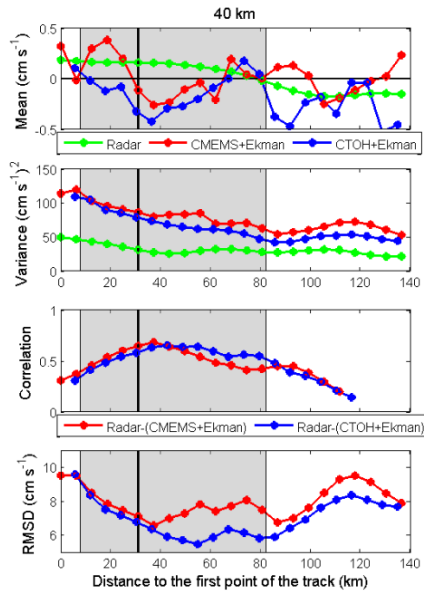

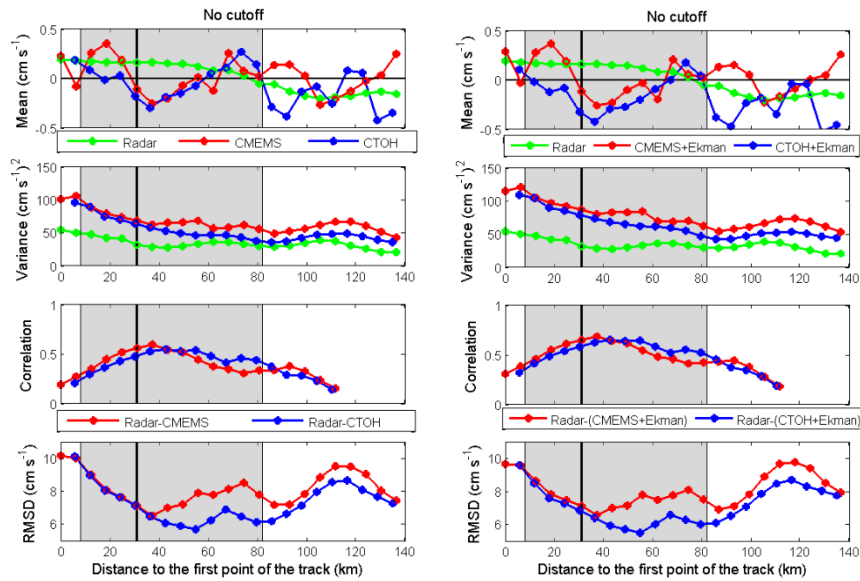

23. page 6: I there is something wrong with eqtn. 3; this applies to a standard orthogonal Cartesian x-y plane with x axis pointing eastwards, y axis pointing northwards and z axis pointing to the opposite direction of gravity; not clear in the text if the geostrophic velocities are computed in this coordinate system. assuming it is so, however, the derivative should be computed along y if one wants the across-track velocity, not x:  $u = -g/f * DSLA/Dy$ .

AR: It is mentioned in page 6 line 12 that x is the along-track distance. Therefore, we are in a rotated plane with respect to the usual coordinate system (where x axis points eastwards and y axis points northwards). For both altimetry tracks (213 and 248) the y axis has a positive westward component and since we assume eastward direction as the positive one (it is the direction of the main currents in the area) we add the minus symbol (considering the -y direction as the positive one) to achieve this.

24. page 6, lines18-31: more details are needed in regard to this. I assume that the comparison is performed after projecting the geostrophic currents in the direction of the radar stations, so to have a "true" comparison between the radial currents. That would be fine if the radars was error-free, which is not the case. Usually, the direction-finding radars suffer from systematic and unpredictable errors in the determination of the incoming signal, which results in statistically significant bearing offsets (see Emery et al., 2004, for additional details). I think this analysis should be extended to a few more angular sectors or the potential limitations properly acknowledged in the text.

AR: The point of this method is to compare currents in across-track direction. If we extend our analysis to a few more angular sectors we would be adding currents that are not in such direction. Actually, as mentioned in the text, 3 radials are already considered to compute the across-track currents in each point (E and W). Another possibility would be to use additional altimeter tracks but the only one in the HFR footprint area in addition to that of Jason altimeter would be that of Sentinel, so it would be difficult to evaluate if the different correlation obtained in both tracks would be due to offsets in the bearing or to differences among SLA data from these two altimeter products.

25. page 7, eqtn. 5: the bulk-flux formula described here has no references-it should be added; is the stress computed at the standard 10-m height? what formulation is used for the drag coefficient? is it wind speed dependent or independent?

AR: With regard to the drag coefficient, the value we used was the one proposed by Large and Pond (1981) which depends on the velocity of the wind at the standard 10-m height ( $U_{10}$ ):

$$\begin{aligned} C_D &= 1.2 \times 10^{-3} & \text{for } 4 < U_{10} < 11 \text{ m s}^{-1} \\ C_D &= 10^{-3} (0.49 + 0.065 U_{10}) & \text{for } 11 < U_{10} < 25 \text{ m s}^{-1} \end{aligned}$$

Note that we have considered  $1.2 \times 10^{-3}$  for every value smaller than  $11 \text{ m s}^{-1}$  and  $10^{-3} (0.49 + 0.065 U_{10})$  for larger values.

AC: We have added Large and Pond (1981) reference at page 8, line 2. A reference (Stewart, R.H.: Introduction to Physical Oceanography, Texas A & M University, 2004) has been added regarding the bulk-flux formula (eq. 5) at page 7, line 30.

26. page 8, lines 7-8: HF again I suspect stays for "high-frequency"; so, the Ekman currents are computed then low-pass filtered with the same 10-d moving average filter. same considerations as before apply also to this product - a spatial filtering should also be applied.

AR: Same answer of the comment 22.

### Section 3

27. I would like to see the actual 95%-99% CL to correlation and statistics; are changes in correlation statistically significant?

AR: Same answer of comment 4.

28. based on Table1, the high standard deviations do compensate for any changes in mean values, and as such I would be cautious in interpreting similar variations.

AR: You are right.

AC: A clarification has been added at page 11, line 15.

29. it is stated that in general adding the Ekman currents decreases rmsd but adds variability; it would be interesting to see a plot of these terms and try understand if the added variability reflects in the intrinsic variability of the Ekman term.

AR: The Ekman component is in good agreement with HFR and altimetry series, thus when it is added to the altimetry it strengthens its effects, and consequently increases the variability. See next figures:



## Ekman current addition: in E

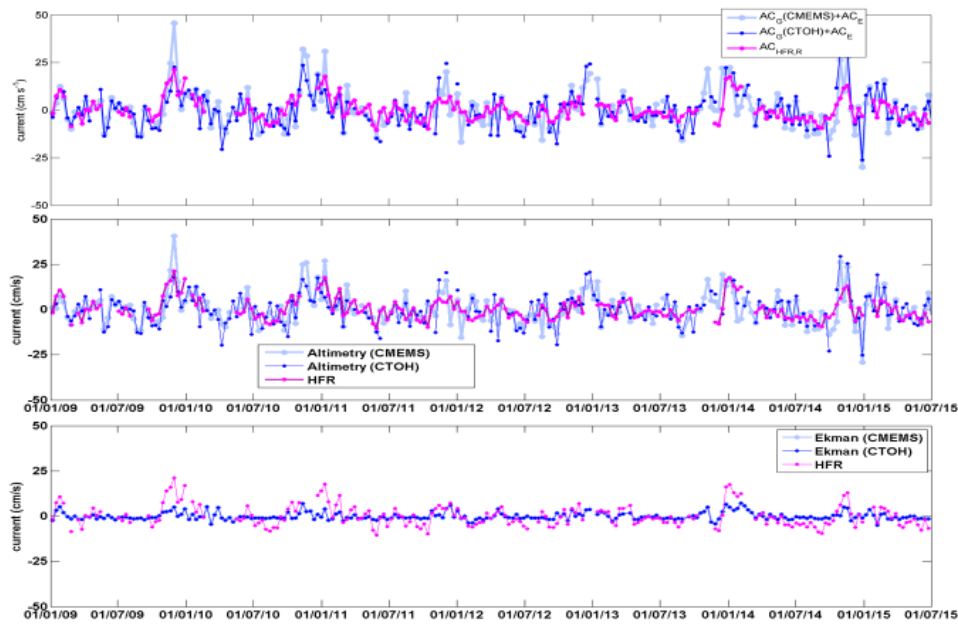

## Ekman current addition: in W

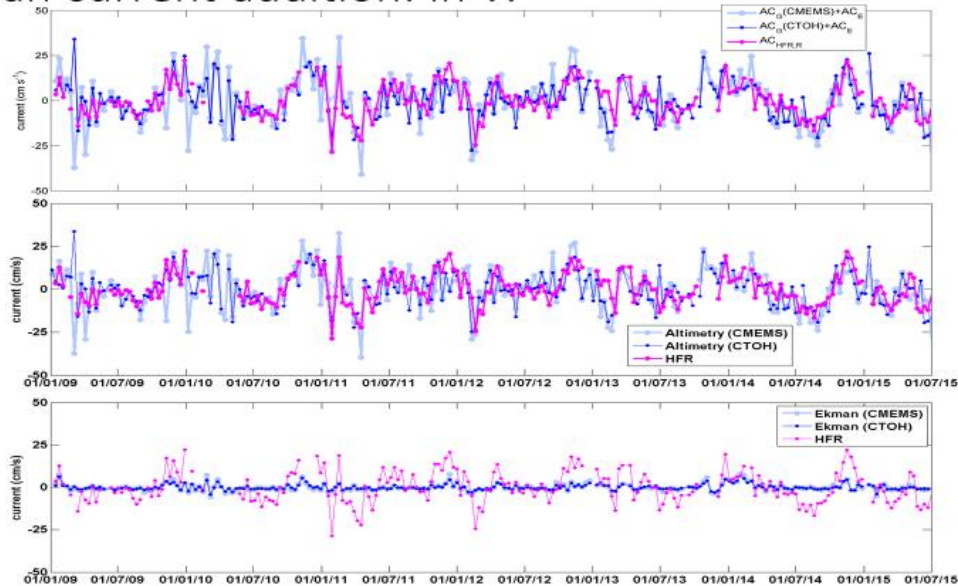

30. Figure 5 needs some additional analysis and comments: interestingly, HFR-altimetry correlation is maximised at around 40-60 km which is comparable to the size of the altimetry spatial filtering window; the HFR dataset shows an inversion at the edge of the grey-marked area (which corresponds to the 1000m isobath); but neither the CMEMS or the CTOH products follow that pattern. why is it so? what are the sources of a similar disagreement?

AR: Although the correlation is maximized at around 40-60 km it already starts decreasing before the 1000 m isobath is reached. In addition, when the analysis with the spatially filtered radar data was carried out (see figures at comment 22), the pattern of the correlation did not change.

With regard to the inversion at the edge of the slope, it is mentioned in the text that the mean values of the currents are really small and that they are very close to zero. Therefore, the differences that are shown in figure 5 are subtle. Additionally, this greater variability of the altimetry data agrees with what it has been mentioned and shown throughout the manuscript: a larger variability in the altimetry data set. The tendency that the HFR data set shows is expectable (westward currents in winter and eastward currents in summer) and it agrees with the altimetry data if we carry out a seasonal analysis (see figures below). It can be observed that the mean value is going to be close to zero, and if we consider the spring and autumn data, we finally obtain the results of Figure 5.

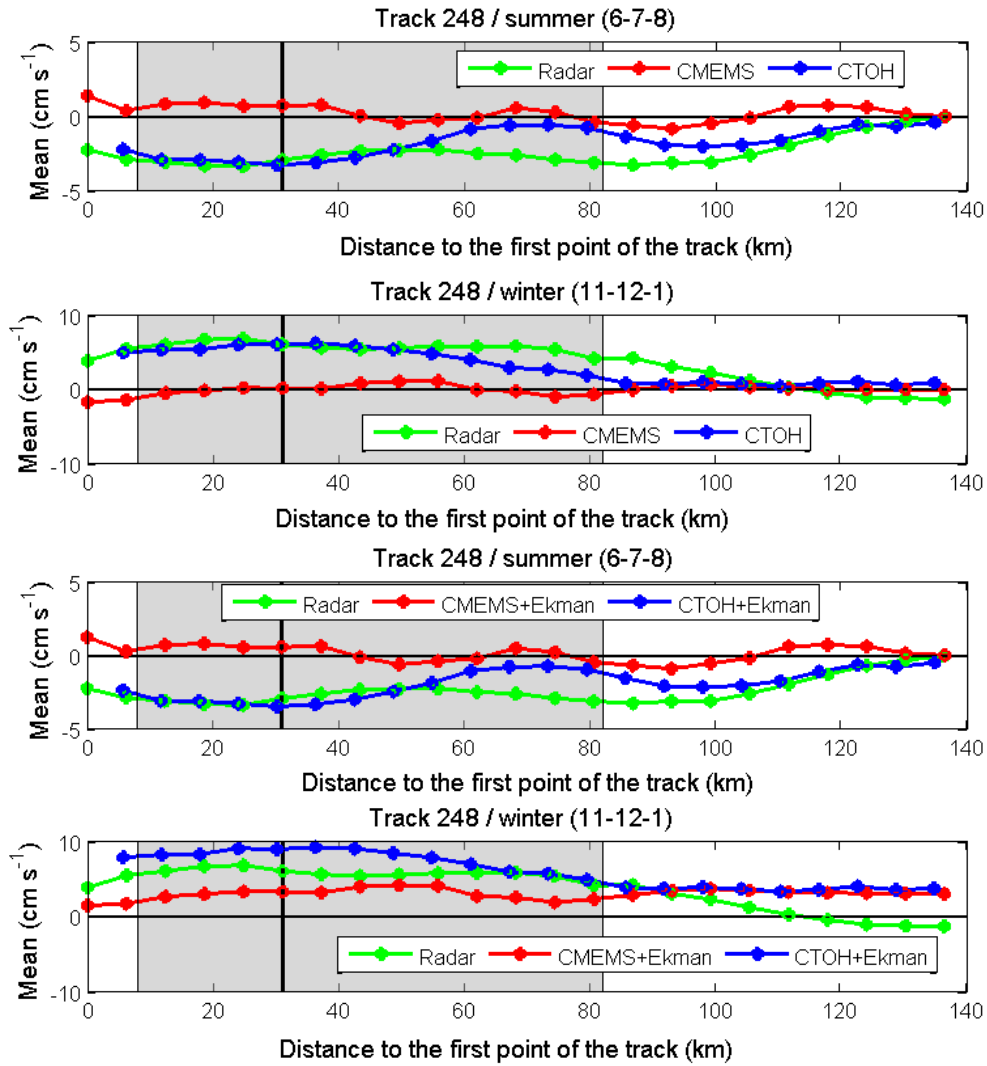

31. While in general there is an agreement between the mesoscale patterns (Figure 8 for instance), comparison is poor in the region close to shoreline where the altimetry products are often in opposite direction to the HFR data. In this sense, it would be interesting: 1, to investigate a bit further the assumptions of geostrophic balance in the boundary regions; 2, try to merge the altimetry and HFR data so to correct and in this way maximise the two products

AR: Thank you for these comments. Since they are interesting work lines for the future, we have added them in the discussion.

AC: Page 15, lines 4-6.
